# Supplementary material
Source: HighWire-hosted journal article supplement (https://bmjopen.bmj.com/content/11/12/e051550)
Supplement: inline-supplementary-material-1 [file inline-supplementary-material-1.pdf]

## Consolidated criteria for reporting qualitative studies (COREQ): 32-item checklist

Developed from:

Tong A, Sainsbury P, Craig J. Consolidated criteria for reporting qualitative research (COREQ): a 32-item checklist for interviews and focus groups. *International Journal for Quality in Health Care*. 2007. Volume 19, Number 6: pp. 349 – 357

| Topic                                          | Item No. | Guide questions/description                                                                                                                              | Reported on Page # |
|------------------------------------------------|----------|----------------------------------------------------------------------------------------------------------------------------------------------------------|--------------------|
| <b>Domain 1: Research team and reflexivity</b> |          |                                                                                                                                                          |                    |
| <i>Personal Characteristics</i>                |          |                                                                                                                                                          |                    |
| Interviewer/facilitator                        | 1        | Which author/s conducted the interview or focus group?                                                                                                   | Author information |
| Credentials                                    | 2        | What were the researcher's credentials? E.g. PhD, MD                                                                                                     | Author information |
| Occupation                                     | 3        | What was their occupation at the time of the study?                                                                                                      | Author information |
| Gender                                         | 4        | Was the researcher male or female?                                                                                                                       | Author information |
| Experience and training                        | 5        | What experience or training did the researcher have?                                                                                                     | N/A                |
| <i>Relationship with participants</i>          |          |                                                                                                                                                          |                    |
| Relationship established                       | 6        | Was a relationship established prior to study commencement?                                                                                              | 2                  |
| Participant knowledge of the interviewer       | 7        | What did the participants know about the researcher? e.g. personal goals, reasons for doing the research                                                 | 3                  |
| Interviewer characteristics                    | 8        | What characteristics were reported about the interviewer/facilitator? e.g. Bias, assumptions, reasons and interests in the research topic                | N/A                |
| <b>Domain 2: study design</b>                  |          |                                                                                                                                                          |                    |
| <i>Theoretical framework</i>                   |          |                                                                                                                                                          |                    |
| Methodological orientation and Theory          | 9        | What methodological orientation was stated to underpin the study? e.g. grounded theory, discourse analysis, ethnography, phenomenology, content analysis | 3                  |
| <i>Participant selection</i>                   |          |                                                                                                                                                          |                    |
| Sampling                                       | 10       | How were participants selected? e.g. purposive, convenience, consecutive, snowball                                                                       | 2                  |
| Method of approach                             | 11       | How were participants approached? e.g. face-to-face, telephone, mail, email                                                                              | 3                  |
| Sample size                                    | 12       | How many participants were in the study?                                                                                                                 | 3                  |
| Non-participation                              | 13       | How many people refused to                                                                                                                               | N/A                |

|                                        |    | participate or dropped out?<br>Reasons?                                                                                         |              |
|----------------------------------------|----|---------------------------------------------------------------------------------------------------------------------------------|--------------|
| <i>Setting</i>                         |    |                                                                                                                                 |              |
| Setting of data collection             | 14 | Where was the data collected?<br>e.g. home, clinic, workplace                                                                   | 3            |
| Presence of non-participants           | 15 | Was anyone else present besides the participants and researchers?                                                               | N/A          |
| Description of sample                  | 16 | What are the important characteristics of the sample?<br>e.g. demographic data, date                                            | 3            |
| <i>Data collection</i>                 |    |                                                                                                                                 |              |
| Interview guide                        | 17 | Were questions, prompts, guides provided by the authors? Was it pilot tested?                                                   | 2            |
| Repeat interviews                      | 18 | Were repeat inter views carried out? If yes, how many?                                                                          | N/A          |
| Audio/visual recording                 | 19 | Did the research use audio or visual recording to collect the data?                                                             | 3            |
| Field notes                            | 20 | Were field notes made during and/or after the interview or focus group?                                                         | N/A          |
| Duration                               | 21 | What was the duration of the inter views or focus group?                                                                        | 3            |
| Data saturation                        | 22 | Was data saturation discussed?                                                                                                  | 7/8          |
| Transcripts returned                   | 23 | Were transcripts returned to participants for comment and/or correction?                                                        | N/A          |
| <b>Domain 3: analysis and findings</b> |    |                                                                                                                                 |              |
| <i>Data analysis</i>                   |    |                                                                                                                                 |              |
| Number of data coders                  | 24 | How many data coders coded the data?                                                                                            | 3            |
| Description of the coding tree         | 25 | Did authors provide a description of the coding tree?                                                                           | Supp. file 1 |
| Derivation of themes                   | 26 | Were themes identified in advance or derived from the data?                                                                     | 3            |
| Software                               | 27 | What software, if applicable, was used to manage the data?                                                                      | 3            |
| Participant checking                   | 28 | Did participants provide feedback on the findings?                                                                              | 7            |
| <i>Reporting</i>                       |    |                                                                                                                                 |              |
| Quotations presented                   | 29 | Were participant quotations presented to illustrate the themes/findings? Was each quotation identified? e.g. participant number | 4-6          |
| Data and findings consistent           | 30 | Was there consistency between the data presented and the findings?                                                              | 4-6          |
| Clarity of major themes                | 31 | Were major themes clearly presented in the findings?                                                                            | 4-6          |

|                         |    |                                                                        |     |
|-------------------------|----|------------------------------------------------------------------------|-----|
| Clarity of minor themes | 32 | Is there a description of diverse cases or discussion of minor themes? | 4-6 |
|-------------------------|----|------------------------------------------------------------------------|-----|
